# Supplementary material for: Genome-wide identification of Wig-1 mRNA targets by RIP-Seq analysis
Source: PubMed Central journal article supplement (PMC4811505; doi:10.18632/oncotarget.6557), 2015-12-11
Supplement: oncotarget-07-1895-s001.pdf [file oncotarget-07-1895-s001.pdf]

SUPPLEMENTARY FIGURES AND TABLES

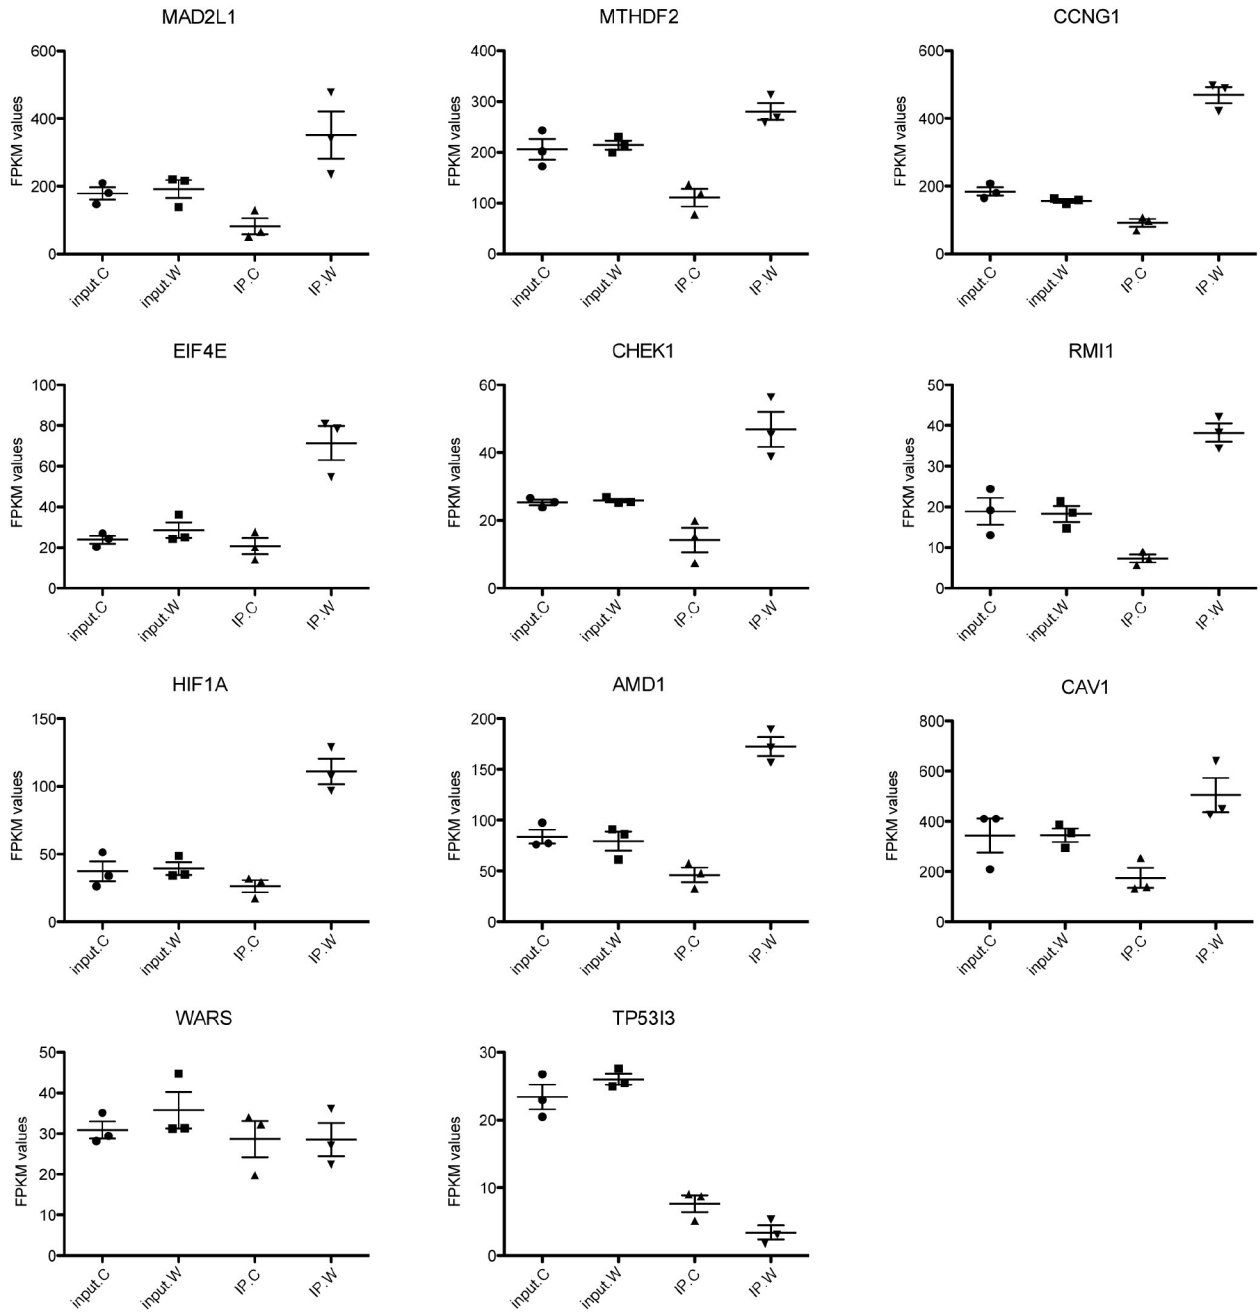

Supplementary Figure S1: FPKM values calculated in the triplicates RIP-Seq experiments per sample for the selected targets in HCT116 cells.

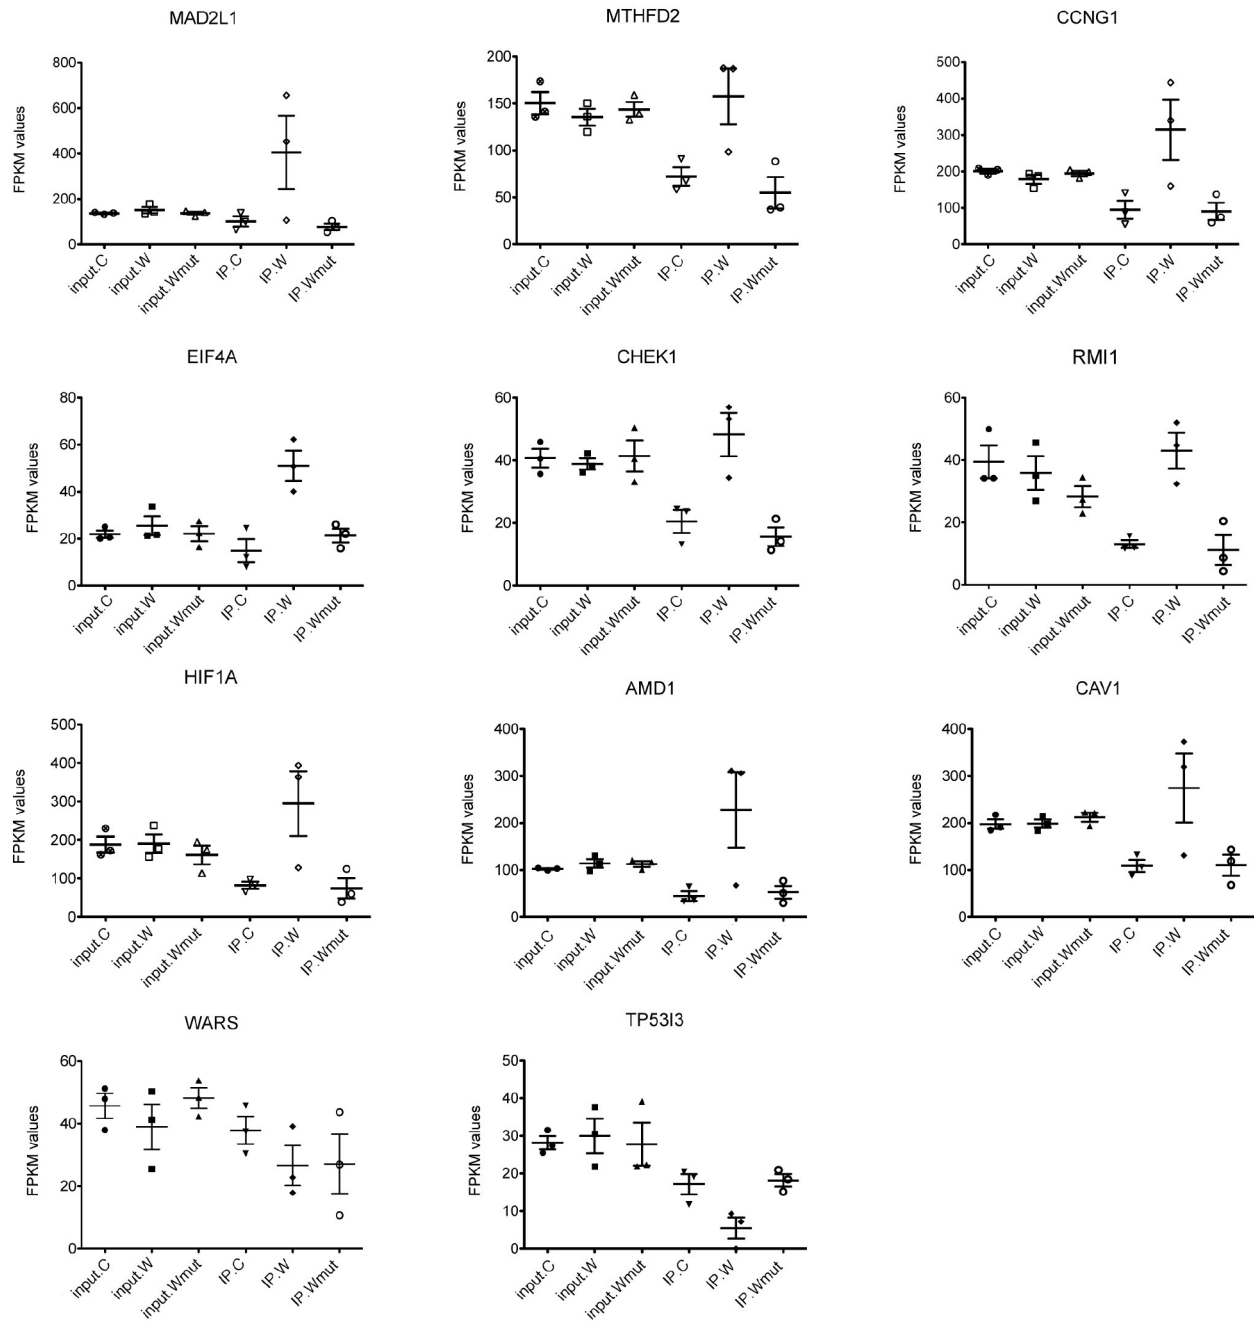

**Supplementary Figure S2: FPKM values calculated in the triplicates RIP-Seq experiments per sample for the selected targets in Saos-2 cells.**

a. CCNG1

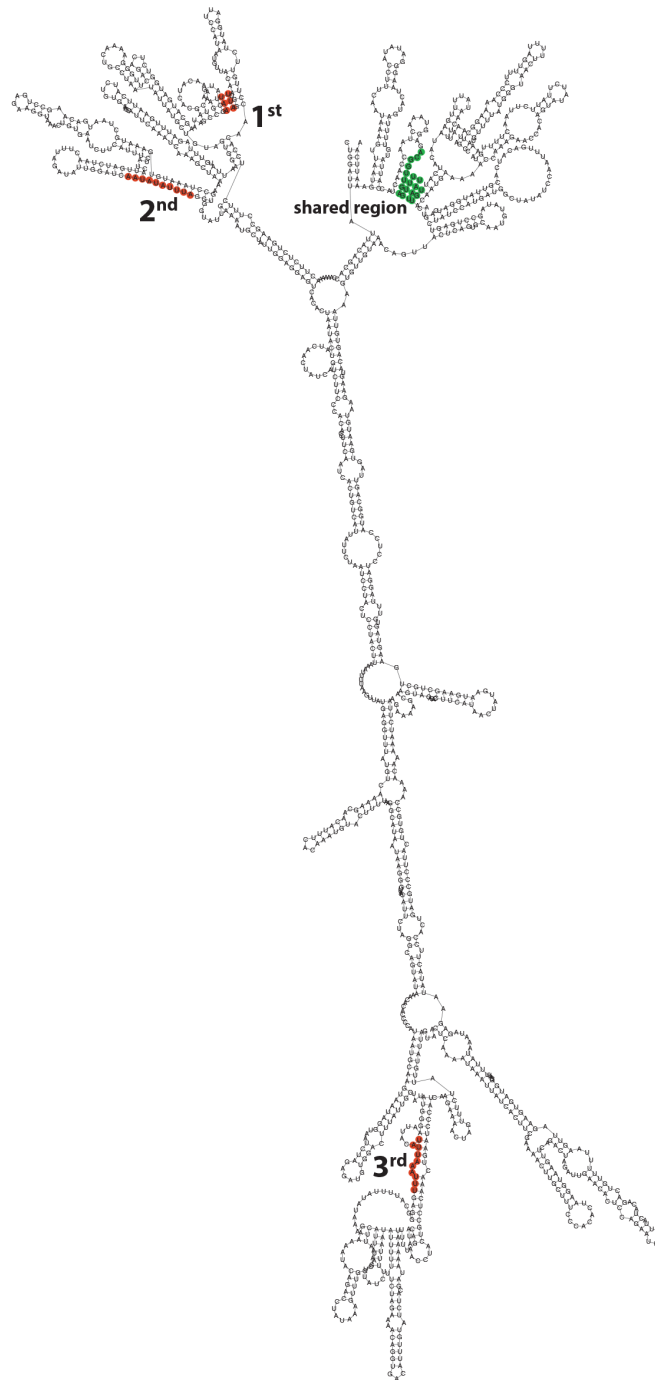

Supplementary Figure S3: 2D sequence structures predicted by RNAfold for the 9 bound 3'UTR sequences. ARE elements are colored in red, consensus 2D motifs are colored in green (indicated as “shared motif”). A. CCNG1. (Continued).

**b. RMI1**

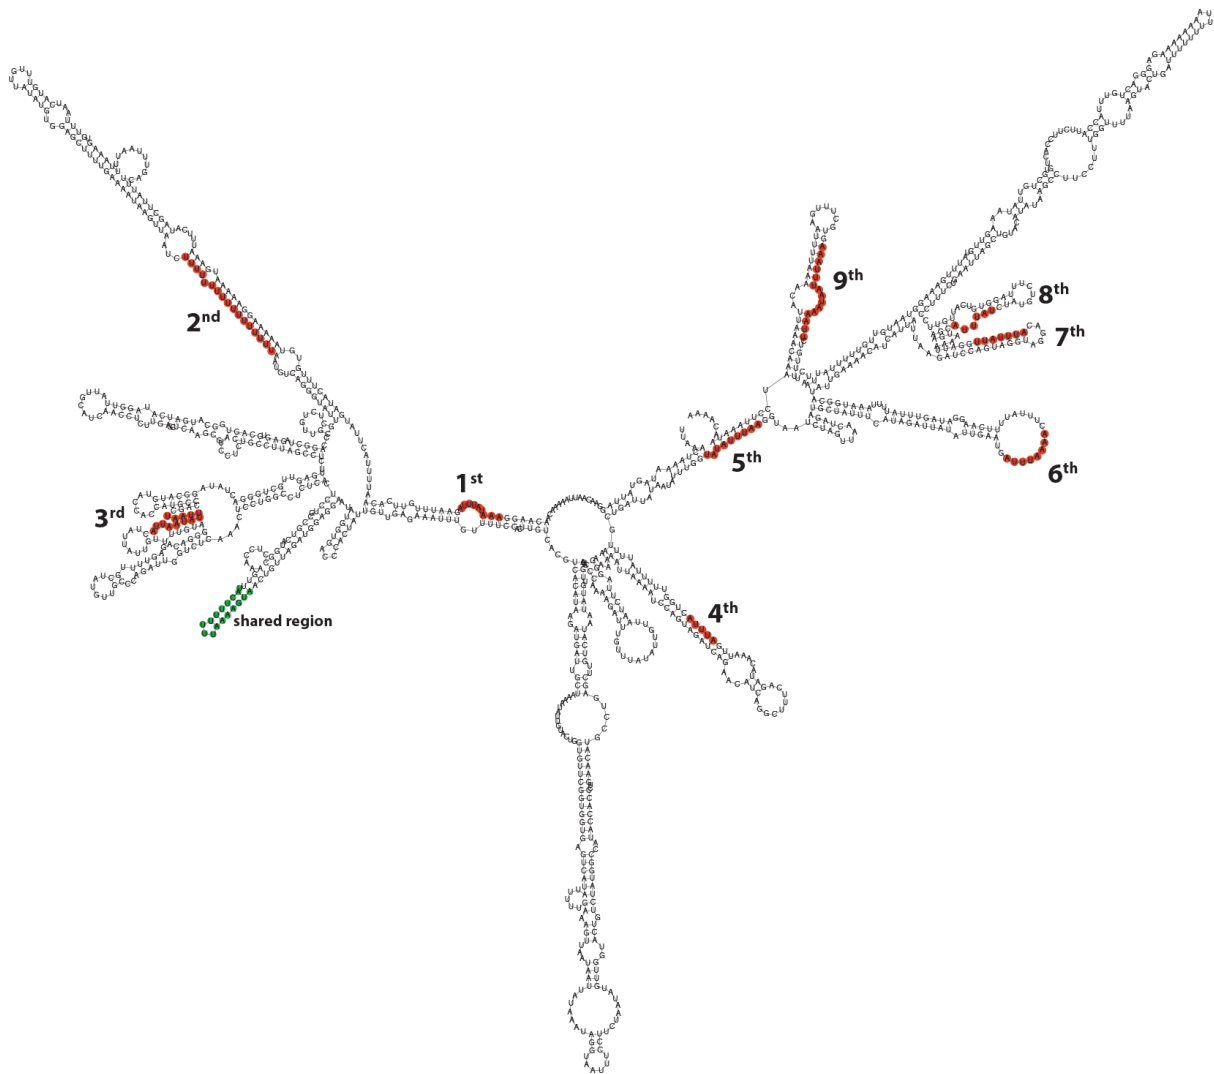

Supplementary Figure S3: (Continued) 2D sequence structures predicted by RNAfold for the 9 bound 3'UTR sequences. ARE elements are colored in red, consensus 2D motifs are colored in green (indicated as "shared motif"). B.RMI1. (Continued)

## c. CHEK1

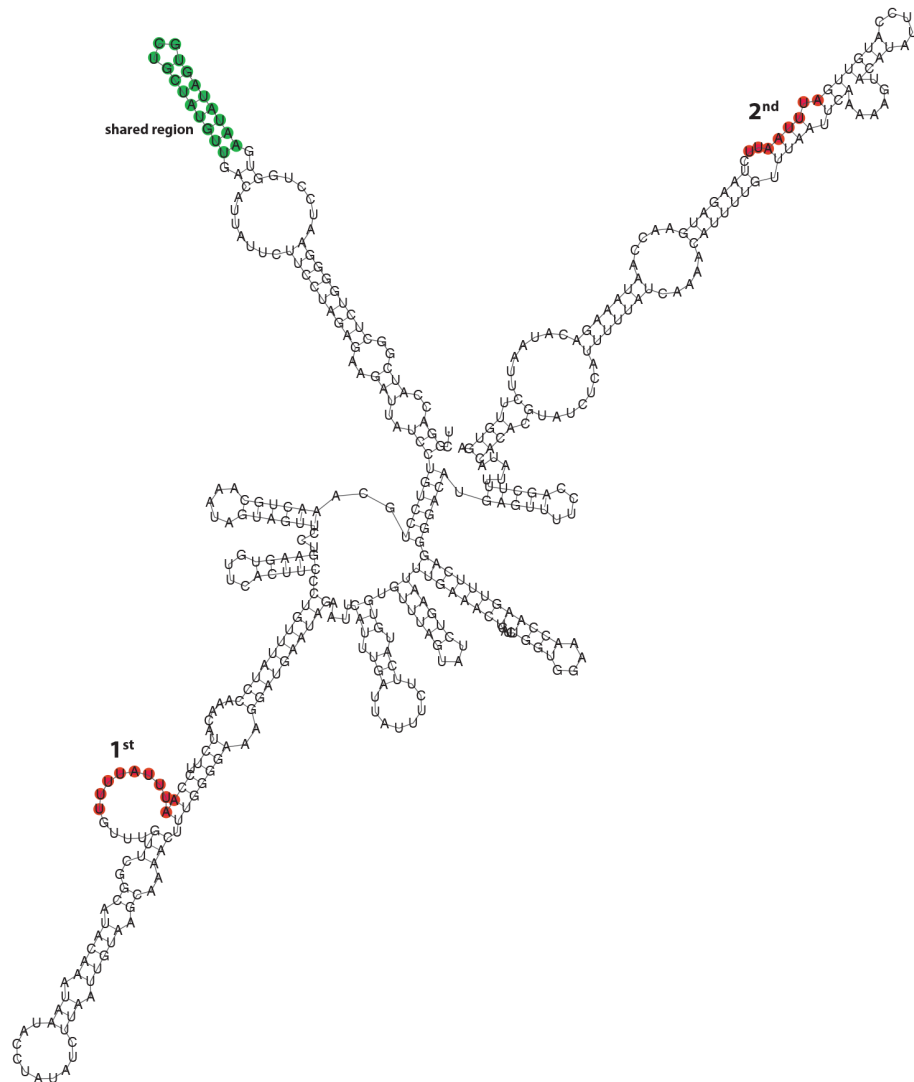

Supplementary Figure S3: (Continued) 2D sequence structures predicted by RNAfold for the 9 bound 3'UTR sequences. ARE elements are colored in red, consensus 2D motifs are colored in green (indicated as "shared motif"). C. CHEK1. (Continued)

## d. MTHFD2

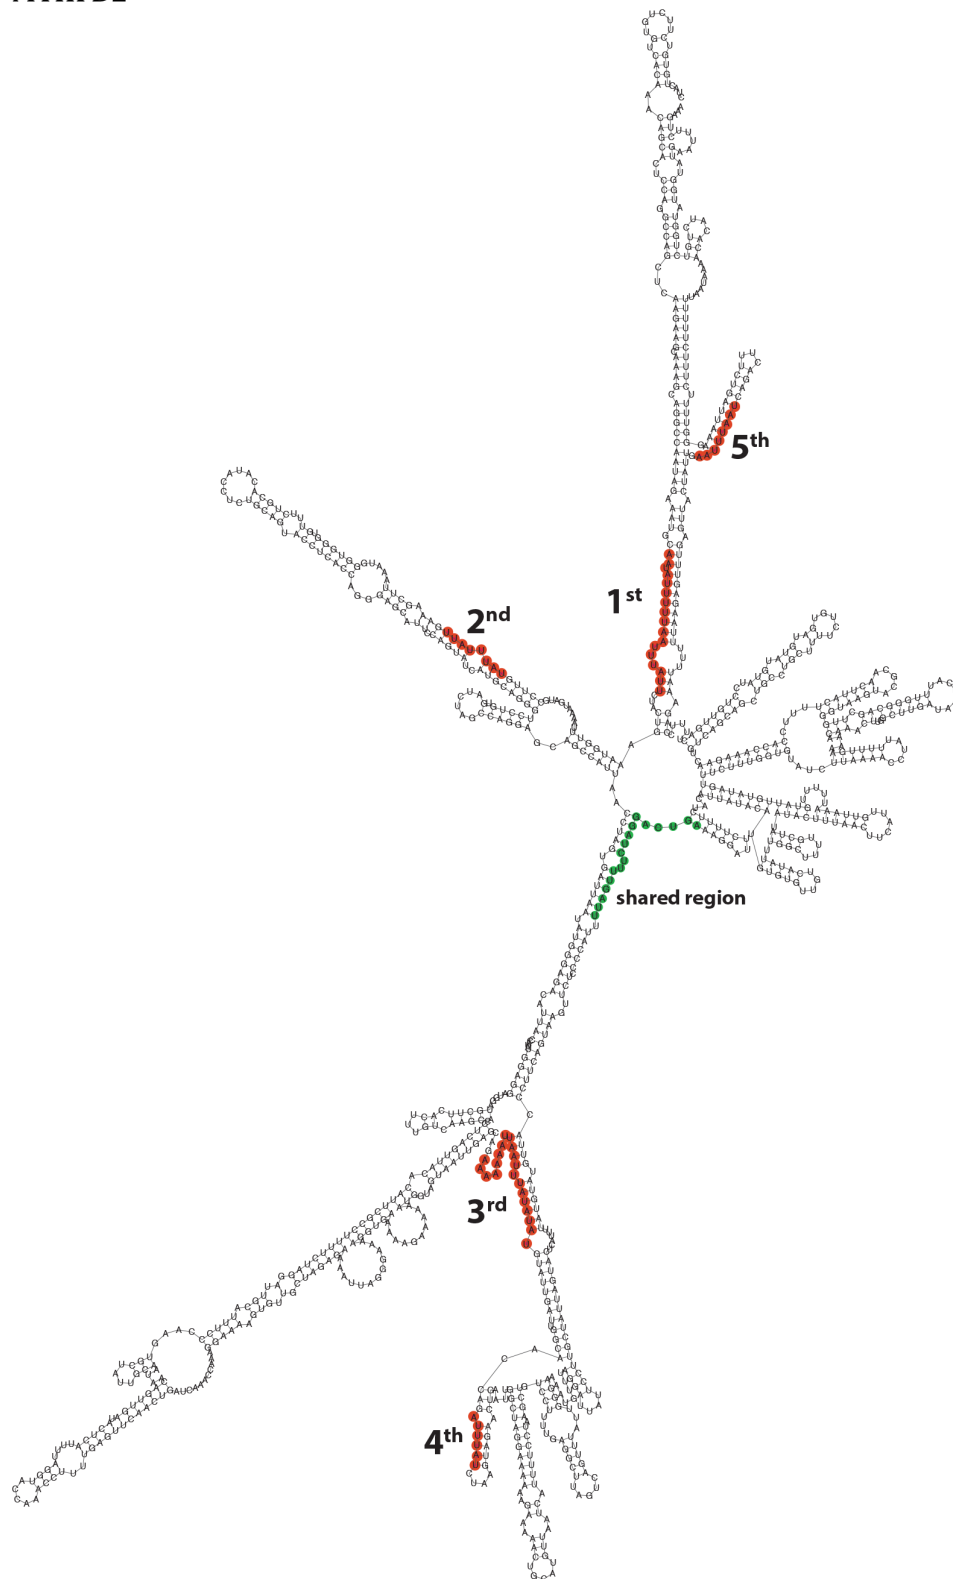

Supplementary Figure S3: (Continued) 2D sequence structures predicted by RNAfold for the 9 bound 3'UTR sequences. ARE elements are colored in red, consensus 2D motifs are colored in green (indicated as "shared motif").  
D. MTHFD2 (Continued)

## e. CAV1

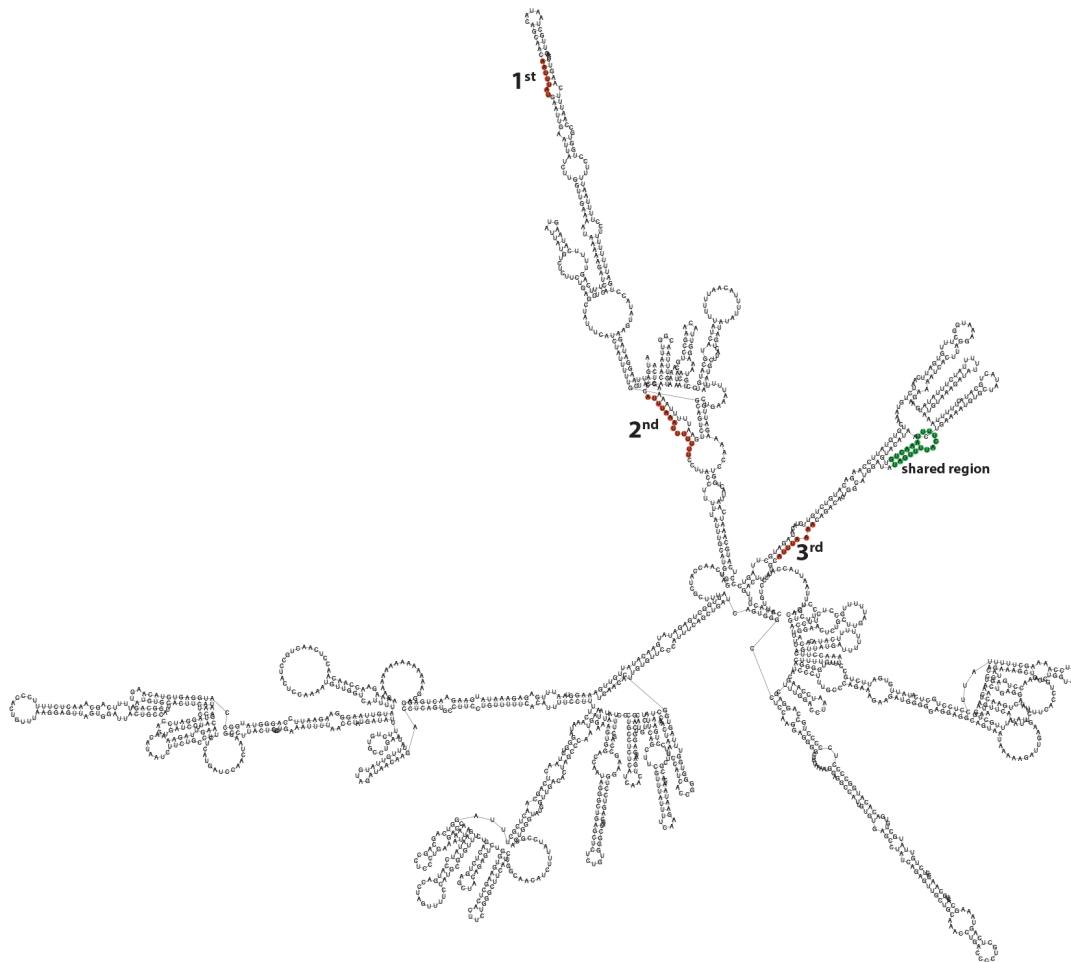

Supplementary Figure S3: (Continued) 2D sequence structures predicted by RNAfold for the 9 bound 3'UTR sequences. ARE elements are colored in red, consensus 2D motifs are colored in green (indicated as "shared motif"). E. CAV1. (Continued)

## f. AMD1

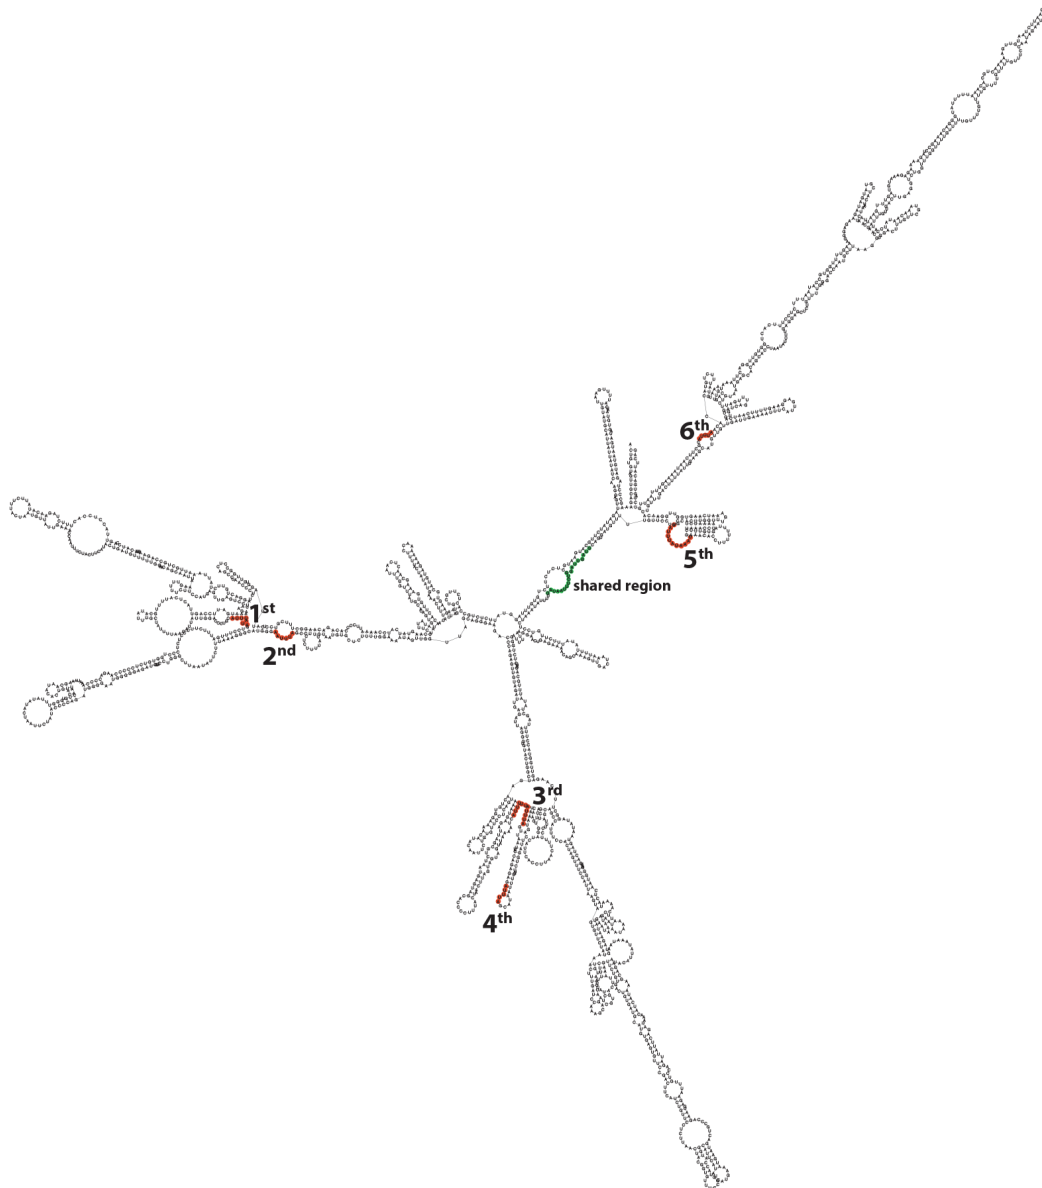

Supplementary Figure S3: (Continued) 2D sequence structures predicted by RNAfold for the 9 bound 3'UTR sequences. ARE elements are colored in red, consensus 2D motifs are colored in green (indicated as "shared motif"). F. AMD1. (Continued)



## g. HIF1A

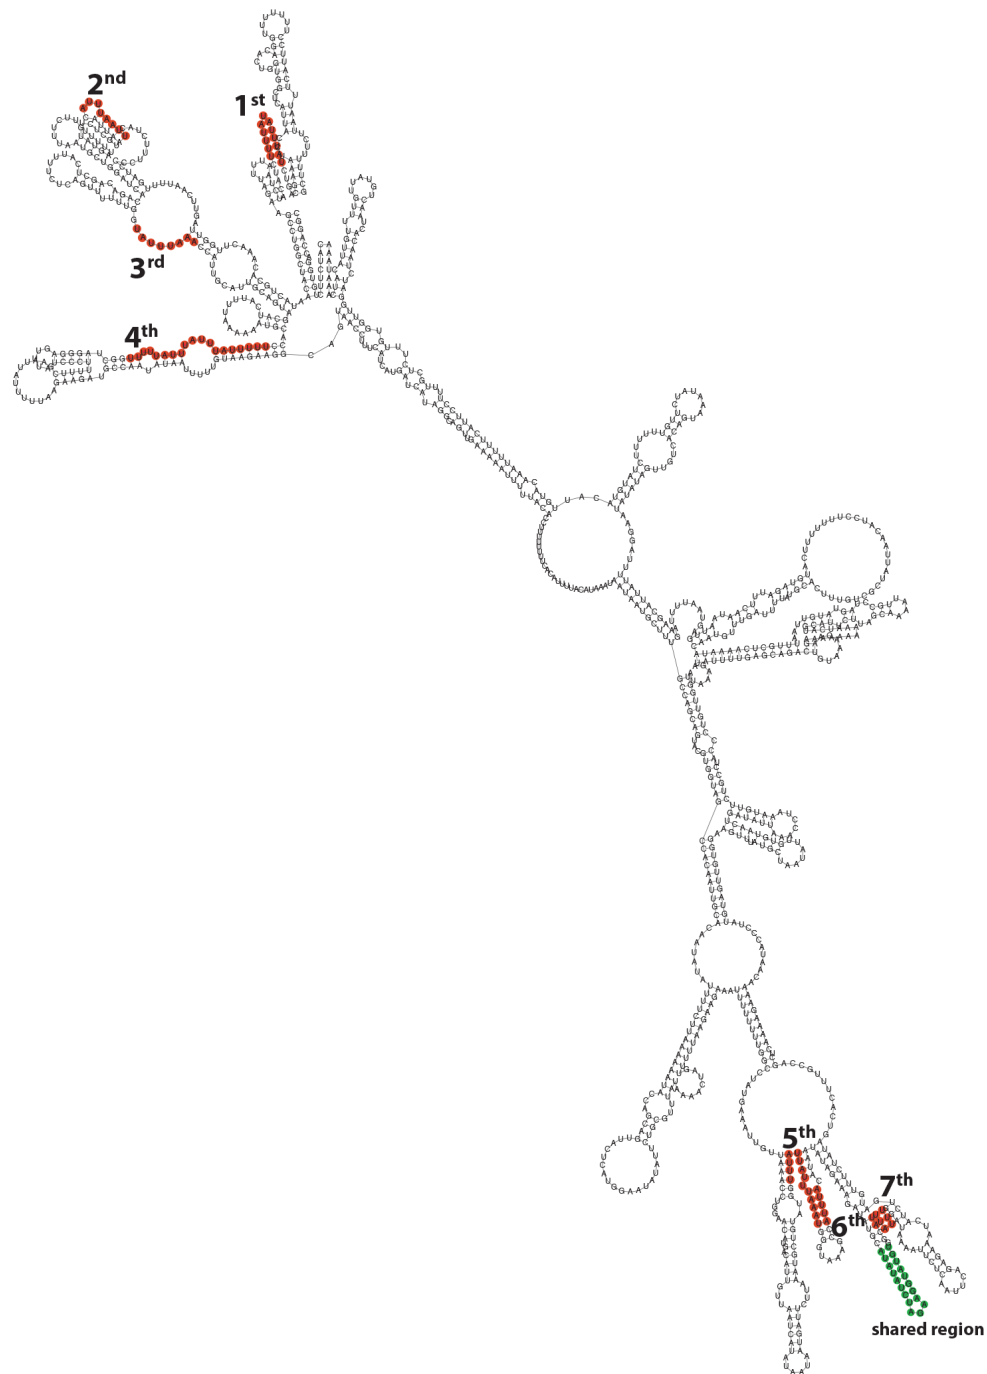

Supplementary Figure S3: (Continued) 2D sequence structures predicted by RNAfold for the 9 bound 3'UTR sequences. ARE elements are colored in red, consensus 2D motifs are colored in green (indicated as "shared motif"). G. HIF1A. (Continued)

## h. MAD2L1

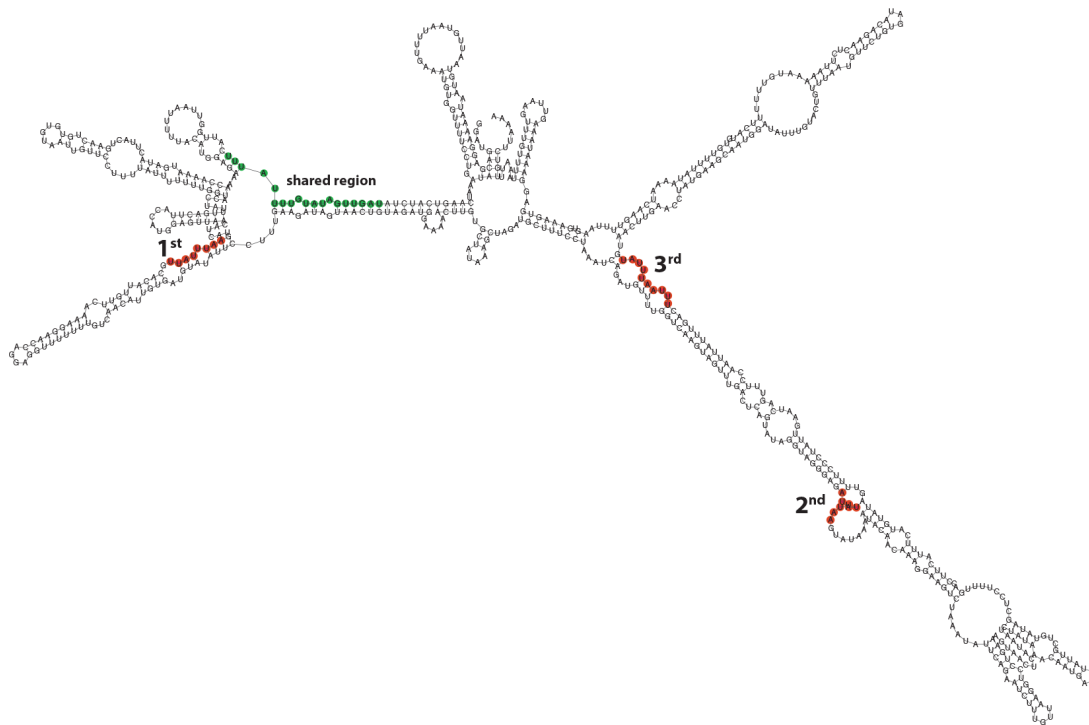

Supplementary Figure S3: (Continued) 2D sequence structures predicted by RNAfold for the 9 bound 3'UTR sequences. ARE elements are colored in red, consensus 2D motifs are colored in green (indicated as "shared motif"). H. MAD2L1. (Continued)

i. EIF4E

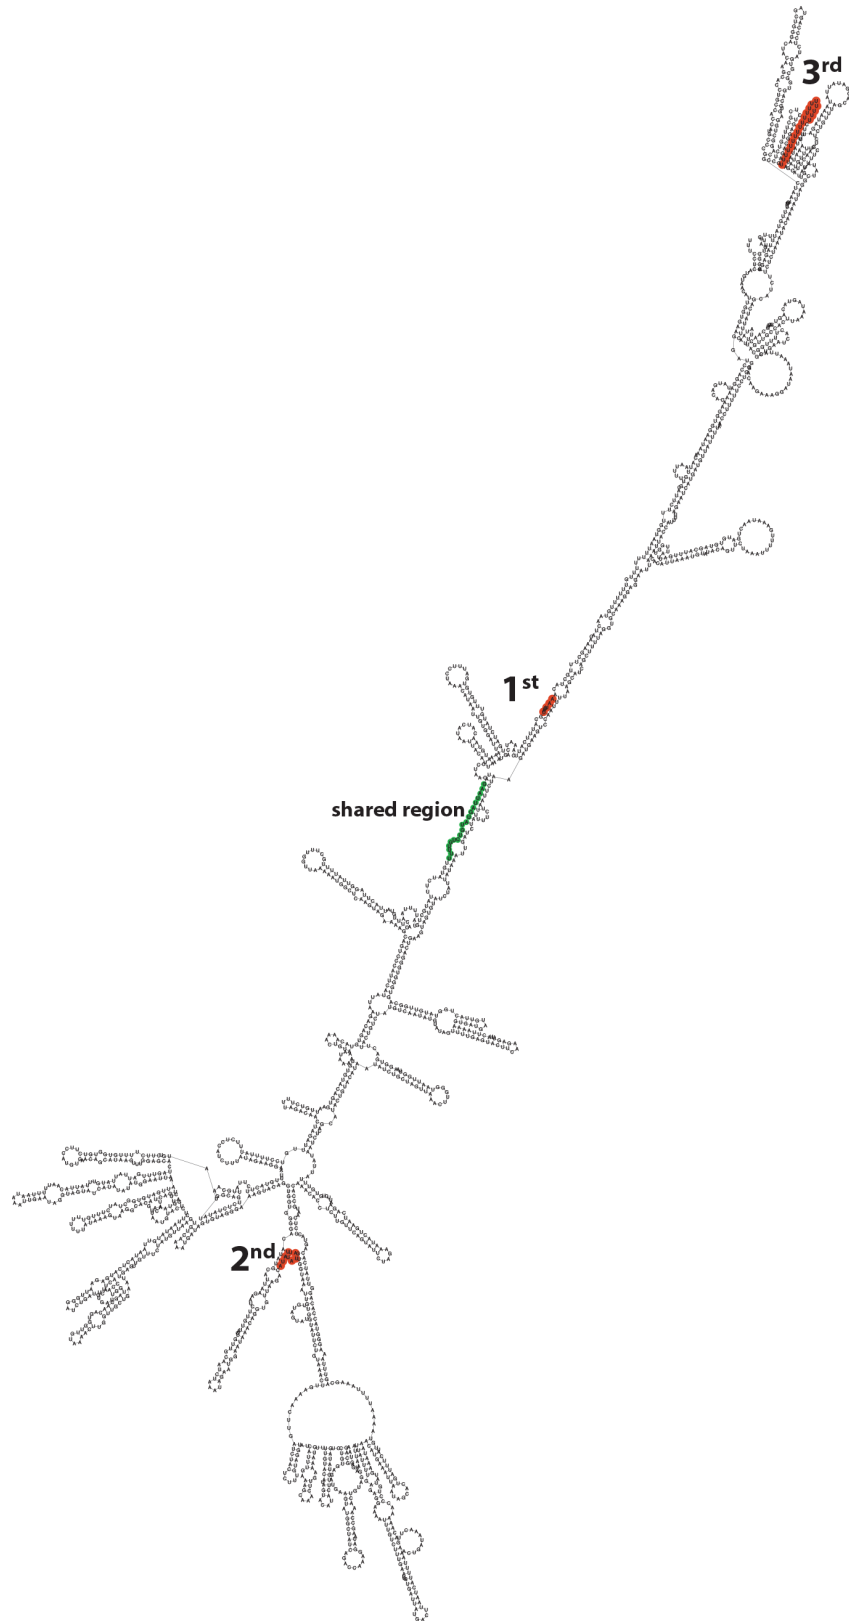

Supplementary Figure S3: (Continued) 2D sequence structures predicted by RNAfold for the 9 bound 3'UTR sequences. ARE elements are colored in red, consensus 2D motifs are colored in green (indicated as "shared motif").  
I. EIF4E. (Continued)

>CCNG1  
 CTGGATTATTACAGCACCAAAAACTTCTCTGAAGCCTTCTCCACAACCTTGTTCTATGGATTCCATAATGTTACAATGGATTTA  
 AGCTATGAAGCCTCAAAACATCAGAGATAAGCATGATGGTCTCAGACTTGGGAAAACGCCTAATATATGCTGTAGTGGAAATTA  
 TGTTTTAGATTTGAATTCATCTGTGAAGCATTCAAATCAAAGCTAAAAGCCTAAATGTGAAATGCTAATGACAAGCCTGAGAAGGT  
 AAACTGTGAATCTTCATTTCTATCATTGATCTAAGTCTTAGATATTTGGATCAATATATTAAGGTTGTTGAAATGCTATTTGGAGG  
 AGTCACACTAATACTATCAACTATCAGTCTTCCCACAGCTTCAATCACTGTCTATTCTAATCCTACTCTACTTAAATTTTAAAGT  
 TATGAGGTTTTATGTCAAAAGCAACATTTCCACAATGACTTTAAAGGCATAATAAGGGTTAACATTTCTAGGCAGTATAAACACACC  
 CCATAATGCAAGTAATAGGTAATCTAGAGATGTGGACTTTATTTGCTATATGGGAATTAATTTAAATTTTTTTCTAGAAAACAGGTGACATTTGTATC  
 TAGGATAAAAAATTTTATACAGAACCTACTGCCTCAAACCTGAATCCCAAGAAAACAGTCTTCTATTGTATTAGTAACCTAAAA  
 TAAATATCACTTCGAAAACCTGCTTTCCCACTAAGGTAAGTTCAGACTAGATTGAACACTCCAGAATTTTTTACTACAGACTG  
 TTTTTAAGTTAGAAGTGATGGCAATTTTAAAAAGAGAATATACTTCCACTGATGCCCTTACTGTGCCAAAACAAAAATCTTAAG  
 AAAAGCAAGTAGACACCTTCATAACTATGAATGAAGCTGTGAAGTAGTGTATAGGATCCCTGAGCAGTTAGTGAATGTAAGA  
 AGTACAGTTTAAAGTGTTGTAACAGTTACTCAGTGAATGTATAGCCTGAGTCTATCCATGATGGCTATATCCAAATTTGACATC  
 ACGTTATGGATCAGTACACAATGAAAAACCAAAGAACCACAGTATATCTTATTCTTAACTTTTGTAAACCATGTTTTATGGGTAAAC  
 TTTTTAGTTTTCCAAAAGGCTGATAAATTTCAATATTTGAATACATCATTTGTTAAATTTGAGTTGGCAGAGGTAACCTAACCAA  
 CTACCATTATGTTTTAGTACTAAGGGATATACCTTTCAATAAAGTTAATGAAATTTCAA

>RM11  
 TTAACATAAAATAGTATTAGGAACAATTA AAAACAACAAGGAAATATTA GAATTTGTTCAACAATTTACTTATGATACTTTGTG  
 TAAAAAGGAAAAATGAAATTTTCACTAGCTTATTTCACTTTAATTTTAAAGTGTTTAATCATGTTTGTATATGTGGAGCTTTTGAA  
 AATAAGTTAATCTTTTTTTTTTTTTTAAATGTCAGGGTATTGCTCTGTTGCCAGGCTAGAGTGCAGTGGCATGATCATAGGTT  
 ATTGCATCAACCTTTGAGCTCAAGCGATCCTCTGCCTTAGCCTTGTAGTGTGGGACTATAGGCATGTACCACCATGCCAGC  
 TAATTTATAATTAATCTATTATTGTTTTGTAGGGACAGAGTTTTGCTATGTTGCCAGATTGGTCTCAAACCTCTGGCCTCTCACTCTG  
 CGCCTCATGGCCTCAAAGTTTACTTTTTTAAAGTAACACTGTATGGAGGAATATGGTGACCCTACTATTTGTGAGAAATTTCT  
 TTTCCACTTGTCACTGACATAAAGATGATTTGCTAAAAATATTGTACTGGTGTGGTGGTGTGAGTCATATTTTTGAAAGTTAATAATT  
 ATAAATAGGTAATTTCTTCTAATATGTTGGTACTGTCTATGGCCATACCACCTGAACATGCCTGAGCTGTGCATAATATGTTGA  
 GTACCAAAAAGATTTGTTTATATTGTTAATCTTAGGGA AAAAATTAATAATCCAGTAGATCAGAACATCAGGCTTTTCAAGATACA  
 AATTGATTAATCTGGTTTTTATTTTGTCTGATTATAAATTTGGTATATTAAGGTAAGTAATCTAGTTAACTAGATGCTATTTCAAGATT  
 ATATTGAATGATTTAAAATCTTTATTTTCAAGGATAGTTTATTTTAAATGGCATATTGAAAACATCATTATTAAGATCCAGTAGGT  
 AGGACATTTAATTTGGATTAATAAGGATTTAATCTATGCTTTTAGGTGTCATTTGCCCTTTCTGAATTAGCTGTACATATAAGCC  
 TTCCTTTGGTTTTAAGTACTGATTTTTTTTTAAAAAAGAGGGACTGTTTACCATTCTTCCACTGTGCTGTTATAAAGTTGTATT  
 TGAAGGTAATGTTGTTTTATTAATCTTTTGTCTTAAAAATAATTTAAAGTGGTTTTGAAATTTTAAACATTTAAACAATCTTAA  
 ATAACAAA

>CHEK1  
 TCGGACCATCGGCTCTGGGGAATCCTGGTGAAATAGTGTCTGATGTTGACATTATCTTCTAGAGAAGATTATCCTGTCTG  
 AAACCTGCAAAATAGTAGTTCCTGAAGTGTTCACCTCCCTGTTATTCCAAACATCTTCCAAATTTTGTGGTCTGGCATACAAA  
 AATACCTATATCTTAATTTGAAGCAAACTTTGGGAAAGGATGAATAGAATTCATTTGATTTTCTTTCATGTGTGTTTAGTATC  
 TGAATTTGAAACTCATCTGGTGAAACCAAGTTTCAGGGGACATGAGTTTTCCAGCTTTTATACACACGATATCTCAATTTTATCAA  
 AACATTTTGTTTAATTTCAAAAAGTACATATTTCCATGTTGATTTAATCTAAGATGAACCAATAAAGACATAATTTCTGTGA

>MTHFD2  
 CTACTGTGCTTCTGTGTCCAAAACAGCACTCCAGGCCAGCTCAAGAAGCAAAGCAGGCCAATAGAAATGCAATATTTTAAATTA  
 TTTCTACTGAAATGGTTTAAAAATGATGCCTTGTATTTTAAAGCTTAAATGGGTGGGTGTTTCTGCACATACCTCTGCAGTACCT  
 CACCAGGGAGCATTTCCAGTATCATGCAGGGTCTCTGTGATCTAGCCAGGAGCAGCCATTAACCTAGTGATTAATATGGGAGACATTA  
 CCATATGGGAGGATGCTTCCACTTTGTCAAGCACCTCAGTTACACATTCGCCTTTTCTAGGATTGCATTTCCCAAGTTTCTAGATTG  
 AATAACAGTTGATACTCATTTTAGGTACCAAACTTTTGTAGTTCAACTGATCAAACCAAAGGAAAAGTGTGCTAGAGAAAATTA  
 GGGAAAAGGTGAAAAGAAAATGTTAGTAATTTAGGACGAAAAAATTAATTTATATAATGATTGATTTGGCAACCCAGATTTAATC  
 TAAGTAGAACTGAATTTGGCTAGGAAAAGAAAACCTGCATGTTAATCATTTTCTAAGCTGTCTTTTGGAGCTTAGTCAAGTTTA  
 TTGGGAAAATTTAGGATTAATCTTGTCTATTAGTACTCATTTATGATGTTACCCCTCAGTAAGTTTCCCAAGTTTCTAGTTTT  
 CTAGGACTGAAGGATTTCTTCTACATTATACATGTGTGTTGTCATATTTGGCTTTTGTCTATATACTTTAACTTCATTTGTTAAAT  
 TTTTGTATTGATAGTTTCTTTGGTGTATCTTAAAACTATTTTGA AAAACAACTTTGGCTTGATAATCATTTGGGCAGCTTTGGG  
 TAAGTACGCAACTTACTTTCCACCAAGAAGTGTGACAGCTGCCTGCTTTTCTGTGATGTATGTATCTGTGACTTTTCCAGAA  
 ATTTTTTAAAGCTTTGAGTTACTATTGATTTAATCAGACTTCTGATTAAGAGGTTTTCTTTCTTTTAAATAAAAACACATCTGT  
 CTGGTATGGTATGAATTTCTGAAA

>CAV1  
 ATGACATTTCAAGGATAGAAGTATACCTGATTTTTTTTCTTTTAAATTTTCTGGTGCCTAATTTCAAGTTCCAAGTTGCTAATACA  
 GCAACATTTAATGAAATTTATCTGGTTGAAAATAAAAAGATCACTTCTCAGTTTTTATAAGTATTATGCTCTCTCTGAGCT  
 ATTTTCTATTTTTTGGCAGTCTGAATTTTTAAAACCCATTTAAATTTTTTCTTACCTTTTTATTTGCATGTGGATCAACCATC  
 GCTTTATTGGCTGAGATATGAACATATTGTTGAAAGGTAATTTGAGAGAAATATGAAGAAGCTGAGGAGGAAAAAAGAAAAAGAA  
 AAAGAACCAACAACCTCAACTGCCTACTC AAAATGTTGGTCAATTTATGTTAAGGGAAGAATTTCCAGGGTATGGCCATGGAGTGT  
 ACAAGTATGTTGGGAGATTTTCCAGAACTCTTTTCCCACTGTTTAAAGGAGTATGTTGATTTACTGCCATTCATCTAATCCAGT  
 AGGATCCAGTGTCTTACAAGTTAGAAAACATAATCTTCTGCTTCTCATGATCCAACATAATGCCTTACTCTTTGAAATTTTA  
 ACCTATGATTTTTCTGTGCCTGAATATTGTTATGTAGATAACAAGACCTCAGTGCCTTCTGTTTTTCAACTTTCTAAA  
 TAGGGTCTAACTCAGCAACTCGCTTAGGTGACGAGCCTCCCTGAAGACCAAAATTAGAATATCCATGACCTAGTTTTCCATGGCT  
 GTTTCTGACTCTGAGCTACAGAGTCTGGTGAAGCTCACTTCTGGCTTCTATCTGGCAACATCTTTATCCGATGAGGGTATGGTTGA  
 CACTAGCCCAATGAAATGAAATTAAGTGGCAAAATAGGGCTGAGCTCTGTGGGCTGGCAGCTCTGGAAGCAGCTTTCCCTGCC  
 TCTCATCAACTGAATGAGGTCAGCATGTCTATTCAGTTCGTTTTATTTTCAAGAATAATCACGCTTTCTGAAATCCAACATAATCC

Supplementary Figure S4: (Continued) Sequences of the nine positively validated 3'UTRs bound by Wig-1. Putative ARE elements are highlighted in red, consensus 2D motifs are highlighted in green. (Continued)

ATCACCGGGTGGTTAGTGGCTCAACATTTGTGTTCCCATTTCCAGCTGATCAGTGGGCTCCAAGGAGGGGCTGTA AAAATGGAGGC  
 CATTGTGTGAGCCTATCAGAGTTGCTGCAAACTGACCCCTGCTCAGTAAAGCACTTGC AACCGTCTGTTATGCTGTGACACATGGC  
 CCCTCCCGCTGCCAGGAGCTTTGGACCTAATCCAAGCATCCCTTTGCCGAGAAAGAGATGGGGGAGGAGGCAGTAATAAAAAGAT  
 TGAAGTATTTTGTGGAATAAGTTCAAATTTCTTGAACCTCAAACCTGAGGAATTTACCTGTAAACCTGAGTGTACAGAAAAGCTG  
 CCTGGTATATCAAAAAGCTTTTATTCTCTGCTCATATTTGTATTTCTGCTTTGGGACTTTTCTTAAACCTTCAGTTATGATTT  
 TTTTTCATACACTTATTTGGAACCTCTGCTGATTTTGGCTCTTCCAGTCTTCTGACACTTAAATACCAACCTGTTACTCTATTT  
 GACTTTTTGCAATTTAAAACAGACACTGGCATGGATAAGTTTACTTTTAAACTGTGTACATAACTGAAAACTGTCTACTGCAAT  
 ACTTTTTAAATGTAAGATATTTTATCTTTATATGAAGAAAATCACTTAGGAAATGGCTTTGTGATTCAATCTGTAAACTGTGT  
 ATTCCAAGCATGTCTGTTACATAGATGCTTAGTCCCTCATGCAAACTCAATTAAGTGTCCAAAAGATTTGCTGAAATTTTATATG  
 CTTACTGATATATTTTACAATTTTTTATCATGTCATGCTGTAAGGTTACAAGCTGCACAATAAAAATGTTTAAACGGTTAAACA  
 GTCAT

>AMD1

ACTGTGTAGTTGCAGAAAGCCCTAGATGTAATGATAGTGAATCATTGTAATGTATGCAATTTATATCAAGGAGTTAGATAT  
 CTTGCATGAATGCTCTCTCTGTGTTAGGTATTTCTGCCACTCTGTGTGAAATGAAAGTGCATGTAGAAAAACCTTTTACT  
 ATATGAAAACCTTACAACACTTGTGAAAGCAACTCAATTTGGTTTATGCACAGTGAATATTTCTCAAGTATCATCCAAAATCCC  
 CACAGACAAGGCTTTCGTCCTCATTAGGTGTTGGCCTCAGCCTAACCTCTAGGACTGTCTATTTAAATGCTGCCAGAATTTTACA  
 TCCAGTTACCTCCACTTTCTAGAACATATTTCTTACTAATGTTATTGAAACCAATTTCTACTTTCATCTGATTTTTGGAAACAG  
 CAATTTAAAGTTTTTCTTCCATGAGTTGAGTCCCTAAGAAAATGATCCAGTTACTCATTTTGCATATTTGCTATTTTAAACATTTT  
 GGACCTGCAATTTATGTTCTTCCCTCTCCCTGGTGTCTCCCAAGACCCCAATAAAGCAATACACTGTTAACT  
 GTGGGTTTATATACTAATTTCTATACCCAGATGGGGAATGGGGAGATGGTCCCTGGGCTTAAATTTCTTAAAGGGCATGGGAAAT  
 TTAGCCTCTCTTTTATTGTAATGTGCTCTTTGGAAAATAGTTGGTTAGCAGGGAAGACCCAGAGTTGATAGTTGAGATTAGGGTG  
 TACTGGCTGAACTGTGGAACATACAATTTCTGTGTTCTCAGTAAATGAGATTAGCGTCTAATGAGTAGCACCCTTTACTAACT  
 TAGTAGTAGTATAAAATCAATTTTAACTTACCAGAGAGATTTAGCATAATTTTGTCTGGATTTCAGTAAATCAAGTCA  
 GCTTGGATCATTCACTTAACTTTCTTTAGCAGCATTCCACTAGTTCCATTAAGTAGTGTCTATAAATTTGATCCAAAGC  
 AGAATCAAGTCTTTTCCATCTCGTGAATTTAAAGTTCTGTGACTGTGATGATGATGAGTGTCCGACTTTCATCTGTTCTTAACT  
 ACGGTGTTTCCCTTACCATGGCATTTCATAGGATGAAATGAATGACTGCCAGAATGAGAATTTGTCAGATTATTCAGATAAACA  
 CATAAAGCAGAATACATATAAATAAGTAGAATGAATAAATAAATAAATAAATAAATAAATAAATAAATAAATAAATAAATAAATAA  
 AATAAAGCTTTTCAAGAGTTGGTACCTTTTAGCTATATTTGCAGATTCTCTGGGATTTAAGGAACTGAGAAAACAGCAAAGTTGA  
 CTAATTTTATATTTCTTGTCTCTAAATTTTTGATAAATTCGGATTGATGAGTGTATTTGTTCTCTCCGATTTTATAAAA  
 TGAACACCTTTTTAGTGTCTTAAACCTAAATCTACTTGGTTGAAATCAAGTGGTTGGAACACTGTTGACTTTTATTGTA  
 AGCATGTTGTTGATGAAAAATTTCAATGAGGAAGTTTCAATCAGTGTGATCAGTTTGAATCTGTAATGAGCAGACAGCACTAATAT  
 TTTGAGGAGCTCTGTTTGGAGCAATGCTTAAAGTGGACTTTGTTGTAACAATATCCCAATAGATTTGTTGACTGTAGGTTCT  
 GGTTTGGTTTTGTTTTGTTTTGTTTTGTTTTGTTTTGTTTTGTTTTGTTTTGTTTTGTTTTGTTTTGTTTTGTTTTGTTTTGTTTTG  
 TATGGCAAAAAGCTAGAAAAGAGAAATGATGTTTGAATCATAATCTAAATCATCGATGATAGAAAGAGGAAAGTTTGGTGCC  
 ATAATTTCTCTTTCACTGGTGTGGACTTAAATCAGTTGAAATGATTTCTGTACCACAAATTTGCTTCAATAAAAAGTTAATTT  
 GTCTAGTGACATTCAG

>HIF1A

GCTTTTCTTAATTTTCACTCTTTTTTGGCACTGGTGGCTCATTACCTAAAGCAGTCTATTATATTTTCTACATCTAATTTAG  
 AAGCTGGCTACAATCTGCACAACCTTGGTTAGTTCAATTTGATCCCTTTCTACTTAATTTTACATTAATGCTCTTTTTAGTA  
 TGTCTTTAATGCTGGATCAGACAGCTCATTCTCAGTTTTTTGGTATTTAAACCATTTGCATTGCAGTAGCATCATTAAAA  
 AATGCACCATTATTTATTTATTTTGGCTAGGAGTTTATCCCTTTTTCGAATATTTTAAAGAAGATGCCAATAAATTTTTG  
 TAAGAAGCAGTAACCTTTCATCATGATCATAGGAGTGA AAAATTTTACACCTTTTTTTTACATTTTACATAAATAAATATG  
 CTTTTGCCAGCAGTAGCTGAGCCACAATTCACACAATATATTTCTTAAAAAATACCAGCAGTTACTCATGGAATATATTTCTGGCT  
 TTATAAAACTAGTTTTTAAAGAAATTTTTTTGGCCTATGAAATGTTAAACCTGGAACATGACATTTGTAATCATATAATAA  
 TGATTTTAAATGCTGATGCTTTTATTTTAAATGGTAAAGCCATTTACATAATAGAAAGATATGCATATATCTAGAAGG  
 ATGTTGGCTTTTATTTGGATAAAAATTTCTCAATTCAGAGAAATCTCATGATTTTCTATAGTCACTTTGCCAGCTCAAAGAAACAA  
 TACCCTATGATGTTGGAAGTTTATGCTAATATTTGTGTAAGTATTAACCTAAATGTTCTGCCTACCTGTTGGTATAAAGA  
 TATTTTGGCAGACTGTAACAAGAAAAAATCATGCTTTTACGAAATTTGCTAGTATGTTAATTTGCTCAAAATACAA  
 TGTGTTGATTTTATGCACTTTGCTGCTATTAACATCCTTTTTTTTCTAGTATGATTTCAATAATTTGAGTAATTTAGAAGCATTTT  
 AGGAATATATAGTTGTCACAGTAAATATCTGTTTTTCTATGATGATGTTACAATTTTTCATCTCTTTGCTCTTTGCTGTTGG  
 ATCTAACCACTAAGTATGTTTTGTTACATCAATAAATCAATCTTCTGTGGACCAGGC

>MAD2L1

GGATGACATGAGGAAAAATGTAATTTGTAATTTGAAATGTGTTTCTGAAATCAAGTCACTAATAGTTGATATGTTTATTT  
 CATTTGGTTAATTTTACATGGGAGAAAACCAAATGATACCTTACTGAACTGTGTGTAATTTGTTCTTTTATTTTTTGGTACCTAT  
 TTGACTTACCATGGAGTTAACATCATGCAATTTGTTCAAAGGAACCCAGGAGGTTTTTTTGTCAACATTTGTGATGTA  
 TATTTCTTTGAAGATAGTAACTGTAGATGGA AAAACTTGTGCTATAAAGCTAGATGCTTTCTCAATCAGATGTTTGGTCAAGTA  
 GTTTGACTCAGTATAGGTAGGGAGATATTTAATGATAAATAACAACAAAGGAAGTCTAAATATTCAGAACTTTGTTAAAGTCT  
 GAAAGTAACTCATAATCTATAAACAATGAAATATTTGCTGTATAGCTCCTTTTACCTTTCATTTATGATGTTTCCCTATTGAA  
 TCAGTTTCAAATATTTGACTTTAATTTAATTTAATTTGTAACCTTGAAGCAATGGATTTGACTGTTAATGTTCTGTGATACA  
 GAACCTTAAAAATGTTTTTTCATGTTTATAAATAAATCAAGTTTTAAGTGAAGTGAAGAAATAAAGTTAAGTTGTTTAAAT  
 TTGCTTAAAA

>EIF4E

TTTCTCATGTAACATTTGGTGAAGGATCCAGGAATATGACACAAGGTGGAATAAACATTAATTTTGTGCTCTTTGGTAATTT  
 TTTTGTTTTTTGAACACAAAGCTTTGCTACAAATTTGCAATTTCAATTCAGTGTATGTTTGTGATTTCCATAAC  
 ATAATTTGGATTATAAAAATGTAAACATCAATTTACATTTCAACTTCAACTTGAATTTGATGTTTGTGATTTGTTGATGTT  
 TTTAACTTTGTATTACTTAGGTTATTTGCTTTGGTTAAAAATGGCTCAAGTAGAAAAGCAGTCCCATTCATATAAGACAGTG  
 TACAAAACCTGTAATAAATGTTGACAGTGAATTTGCTTTTGAACAACCTAGATTTGCTCTTTTATTTCTCCATTTTATAAGAGGA  
 ATTTGACTCTTATTTGAAGGAGCTCTCTATATTTATGCTCTTTTGTGGTGTCTTCCATGTGAACAGCAGATAAGTTTGGAGCACT  
 AGTTGATTTATGTTTATTAACAATTTTAAATAAATGAAATAGGTAGTATCATATATGGAATTAATTTGATGTGCTATCTT

Supplementary Figure S4: (Continued) Sequences of the nine positively validated 3'UTRs bound by Wig-1. Putative ARE elements are highlighted in red, consensus 2D motifs are highlighted in green. (Continued)

TGTTTTTTTATAAAGTAAGGCACAGTCATTCAGTCTTAGGTAATAATGTAAGTCTCTTAATATGTTAATACTCATGAGAATTGGGA  
 TCTGATGCATCACCATTTGATTGGTAGCAACAGTGGTTGTAAGAACTTGGTTGCTGAATTGAGTTGTTCTATGTTAAGTGTCAAAA  
 TGATAGTGTAGGAAAAGTACAGTGGTGGGACATATGCATTAAGAATCTTGTAGTGTGCAATCTAAATAGAATGGAATAAAC  
 AGGTGTTAAGACATATTTATAGTGGTAAATTTGTTAGTATGGTATTCTGTAAACTTGAAAACCTTGATCTACTCTTTGTAGGTATC  
 ATTTGAAAAGCAAACCTTGAAAATGTTTTGTACATAGTACATACTTGTATAGTCCTGTGAGATGAAGTATGGCTATCAGACCAAAGG  
 ATAAGCCAAACTGTAGGTAGCAGAATGGAATTTATTTTGTAGAGGAAAATTTGTCTTTGAATGGTATTATGACTTAATCATT  
 TTTAAACTGATAAACTTGACAAAAACCTGTATGAAAATAAACATGAAATTAATAGCACTGATTCATTGAAAATTTTAAAGCAG  
 TTTAAAGGGTACCACAGTTATCACAGTACTCTCAATGCCACAAACACCTCTTGTTCAGTATTCTAGAAAATACTGAATCAGAATTC  
 TGTGTTTTATTATAATCTCAGCATACTGTACATAATATCTGCTAGTAAACTTGGGTAATTGGTTAAGGTGACTTACTGTCTATGTC  
 AATATGTATAGTTTTGAGTACTTCAAGAGTTTACTTAAAAGTGATGATGTTACTGGTATGTTGGCAGTGGGTGGGACTGAAGTAG  
 TGTATCTATTATAAATGATCTATTTTCTTAATCTAAGATGAAGTCCAATTTAAGCATCAGCTTTTAGGTGCAAAGGAGGAATT  
 AACACATTAATGTATACAGTCTAAAATTTTGAATAAAGTATGTTAGTATGTTGTTAGTATTGATTACCATTTTAGAATCATGA  
 TGTATTTTAAACCTTTTCTGGGACAAGAAGGATAATAAATACGCTGAATCAGCTTTTGGCAGTGGCAGTAAATAGTACA  
 GTGACTTGCAACTTTTATAACTTTATCAGCATCTTCTTAAAATACAAAATTAGGCTATATGTTATTTTCCAACCTACTGTTTTCTC  
 TCTGTTTAGCAGGATATTATAAATAGATTAAATAGATATATTTCTTTTTTTTTTTTTTTTTTGGACGGAGTCTCGCTTTGCT  
 CCCAGGCTGGAGTGCAGTGGCGTATCTCCAGTAGCTGGGACTACAAGCACCTGCCACCATGCCCGGCTAATTTTTTTTGTATTTT  
 TAGTAGAGACGGGGTTTC

Supplementary Figure S4: (Continued) Sequences of the nine positively validated 3'UTRs bound by Wig- 1. Putative ARE elements are highlighted in red, consensus 2D motifs are highlighted in green.

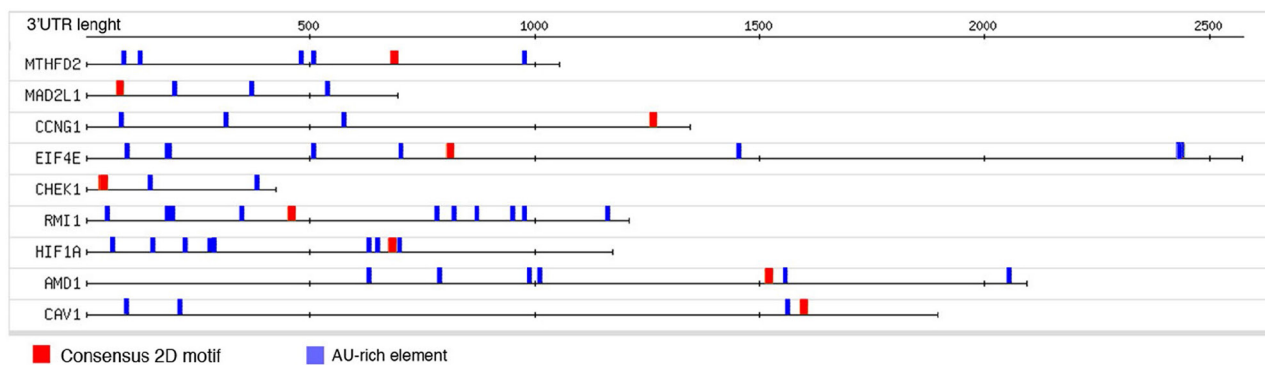

Supplementary Figure S5: Visualization the position of the consensus 2D motifs and the ARE motifs in the 3'UTR sequences of the validated Wig-1 bound targets. Figure generated by RSAT.

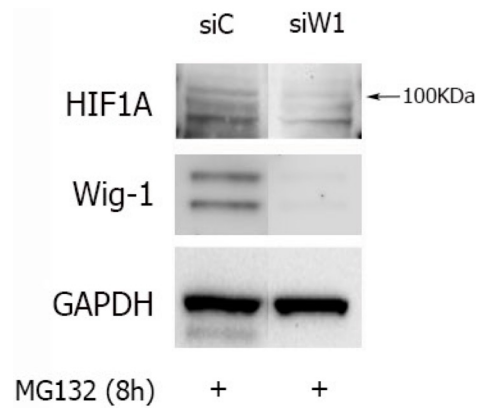

**Supplementary Figure S6: Wig-1 knockdown does not affect HIF1A protein levels.** HCT116 cells were transfected with 10nM siRNA against Wig-1 (siW1) or control siRNA (siC). Forty-eight hours after transfections cells were treated with 20  $\mu$ M MG132 proteasome inhibitor for 8 h and the levels of nuclear HIF1A protein was measured by Western Blotting.

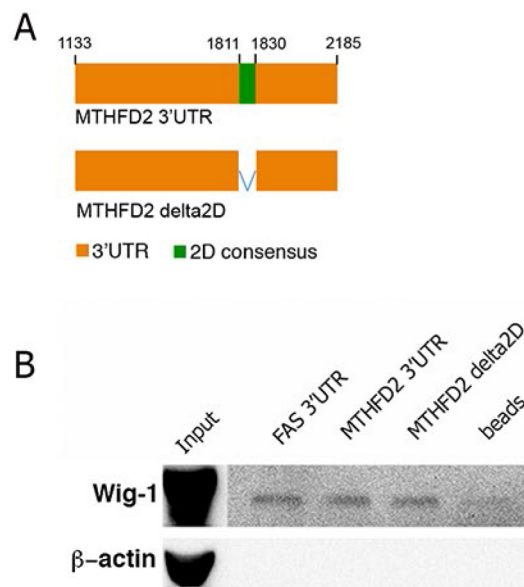

**Supplementary Figure S7: A.** Model of the MTHFD2 constructs used for biotin pulldown (see materials and methods for details). **B.** Biotin pull-down assay using the probes in (A.) or a FAS full-length 3'UTR probe as positive control followed by Western blotting for Wig-1 shows that Wig-1 binds to the full length FAS 3'UTR (positive control), the full length MTHFD2 3'UTR probe and the MTHFD2 3'UTR probe with consensus 2D motif deletion (MTHFD2 delta2D) with the same intensity.

**Supplementary Table S1: Percentage of reads mapped to human genome**

| Samples (n=3)    | Average number of paired reads sequenced (MEAN ± S.D.) | Percentage of reads mapped to human genome (MEAN % ± S.D.) | Percentage of reads after duplicate removal (MEAN % ± S.D.) |
|------------------|--------------------------------------------------------|------------------------------------------------------------|-------------------------------------------------------------|
| HCT116 input.C   | 15,446,432 ± 1,253,607                                 | 64 ± 2.55                                                  | 41 ± 1.25                                                   |
| HCT116 input.W   | 15,403,089 ± 318,777                                   | 62 ± 0.95                                                  | 38 ± 1.43                                                   |
| HCT116 IP.C      | 15,466,119 ± 1,577,956                                 | 58 ± 11.73                                                 | 20 ± 7.79                                                   |
| HCT116 IP.W      | 15,870,292 ± 2,191,340                                 | 61 ± 3.39                                                  | 34 ± 1.81                                                   |
| Saos2 input.C    | 16,683,516 ± 6,422,055                                 | 70 ± 4.56                                                  | 52 ± 4.43                                                   |
| Saos2 input.W    | 17,592,957 ± 5,131,259                                 | 71 ± 5.57                                                  | 51 ± 6.56                                                   |
| Saos2 input.Wmut | 19,000,702 ± 3,109,401                                 | 71 ± 3.76                                                  | 53 ± 3.53                                                   |
| Saos2 IP.C       | 20,610,044 ± 11,505,023                                | 41 ± 3.36                                                  | 12 ± 8.10                                                   |
| Saos2 IP.W       | 17,340,104 ± 3,692,727                                 | 46 ± 35.38                                                 | 28 ± 27.12                                                  |
| Saos2 IP.Wmut    | 21,239,267 ± 7,806,368                                 | 42 ± 4.13                                                  | 8 ± 1.67                                                    |

Input.C: input control (empty vector); input.W: input Flag-Wig-1; input.Wmut: input Flag-Wig-1-point mutant; IP.C: IP control (empty vector); IP.W: IP Flag-Wig-1; IP.Wmut: IP Flag-Wig-1point mutant.

**Supplementary Table S2: List of the 2335 Wig-1-bound RNAs in HCT116 cells.**

**Supplementary Table S3: List of the 354 Wig-1-bound RNAs in Saos-2 cells.**

**Supplementary Table S4: List of the 286 common Wig-1-bound RNAs in HCT116 and Saos2 cells.**

**Supplementary Table S5: List of transcripts that are bound by Wig-1 and whose gene expression levels are affected by Wig-1 silencing in HCT116 cells (GEO database GSE43046), at least 4-fold difference ( $\log_2(\text{siRNA Wig-1}/\text{siRNA control})$ ) in at least two out of the three replicates.**

**Supplementary Table S6: Gene ontology Analysis of Wig-1-bound RNAs by DAVID.**

**Supplementary Table S7: List of the 300 pathways identified by network enrichment analysis as enriched at significance level  $\text{FDR} < 0.01$ .**

**Supplementary Table S8: List of the 133 Reactome pathways enriched at significant level of  $\text{FDR} < 0.01$ .**

**Supplementary Table S9: List of pathways identified by network enrichment analysis as enriched at significance level  $\text{FDR} < 0.01$  for bound and regulated Wig-1 targets in HCT116 cell line.**



**Supplementary Table S10: List of the 286 RNAs included in the unbound group.**

**Supplementary Table S11: List of the TaqMan probes used for qRT-PCR.**
